# Supplementary material
Source: publisher site journal article supplement (https://www.dovepress.com/get_supplementary_file.php?f=262613.docx)
Supplement: Supplementary file 1 [file get_supplementary_file.php]

**Supplementary file**

Supplementary Table 1. Patient Information

| Sample Type | Age | Sex | TNM stage |
| --- | --- | --- | --- |
| Cancer Tissues(T1/N1) | 71 | Male | IIIA |
| Cancer Tissues(T2/N2) | 58 | Male | IIIB |
| Cancer Tissues(T3/N3) | 66 | Male | IIIA |
| Cancer Tissues(T4/N4) | 62 | Male | IIIA |
| Cancer Tissues(T5/N5) | 75 | Male | IIIB |

Supplementary Figure 1: Hind III--EcoR I


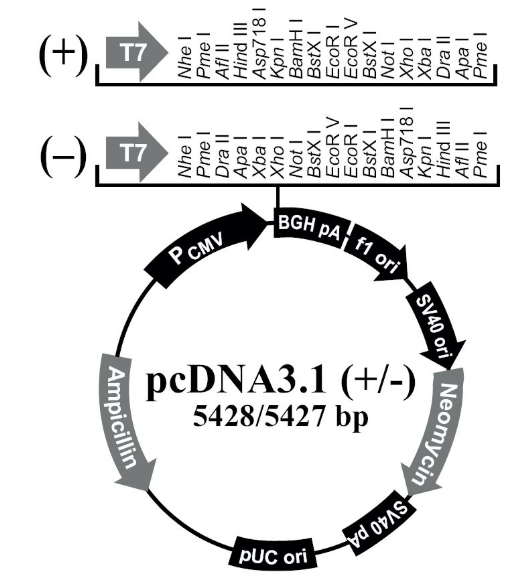


Figure S1.Vector map.

5' Sequencing primers: pcDNA3.1-F:CTAGAGAACCCACTGCTTAC

3' Sequencing primers: pcDNA3.1-R (BGH-R):TAGAAGGCACAGTCGAGG

The sequence of VCAN used in the construction of over-expression vector.

AAGCTTGCCACCATGTTCATAAATATAAAGAGCATCTTATGGATGTGTTCAACCTTAATAGTAACCCATGCGCTACATAAAGTCAAAGTGGGAAAAAGCCCACCGGTGAGGGGCTCCCTCTCTGGAAAAGTCAGCCTACCTTGTCATTTTTCAACGATGCCTACTTTGCCACCCAGTTACAACACCAGTGAATTTCTCCGCATCAAATGGTCTAAGATTGAAGTGGACAAAAATGGAAAAGATTTGAAAGAGACTACTGTCCTTGTGGCCCAAAATGGAAATATCAAGATTGGTCAGGACTACAAAGGGAGAGTGTCTGTGCCCACACATCCCGAGGCTGTGGGCGATGCCTCCCTCACTGTGGTCAAGCTGCTGGCAAGTGATGCGGGTCTTTACCGCTGTGACGTCATGTACGGGATTGAAGACACACAAGACACGGTGTCACTGACTGTGGATGGGGTTGTGTTTCACTACAGGGCGGCAACCAGCAGGTACACACTGAATTTTGAGGCTGCTCAGAAGGCTTGTTTGGACGTTGGGGCAGTCATAGCAACTCCAGAGCAGCTCTTTGCTGCCTATGAAGATGGATTTGAGCAGTGTGACGCAGGCTGGCTGGCTGATCAGACTGTCAGATATCCCATCCGGGCTCCCAGAGTAGGCTGTTATGGAGATAAGATGGGAAAGGCAGGAGTCAGGACTTATGGATTCCGTTCTCCCCAGGAAACTTACGATGTGTATTGTTATGTGGATCATCTGGATGGTGATGTGTTCCACCTCACTGTCCCCAGTAAATTCACCTTCGAGGAGGCTGCAAAAGAGTGTGAAAACCAGGATGCCAGGCTGGCAACAGTGGGGGAACTCCAGGCGGCATGGAGGAACGGCTTTGACCAGTGCGATTACGGGTGGCTGTCGGATGCCAGCGTGCGCCACCCTGTGACTGTGGCCAGGGCCCAGTGTGGAGGTGGTCTACTTGGGGTGAGAACCCTGTATCGTTTTGAGAACCAGACAGGCTTCCCTCCCCCTGATAGCAGATTTGATGCCTACTGCTTTAAACGACCTGATCGCTGCAAAATGAACCCGTGCCTTAACGGAGGCACCTGTTATCCTACTGAAACTTCCTACGTATGCACCTGTGTGCCAGGATACAGCGGAGACCAGTGTGAACTTGATTTTGATGAATGTCACTCTAATCCCTGTCGTAATGGAGCCACTTGTGTTGATGGTTTTAACACATTCAGGTGCCTCTGCCTTCCAAGTTATGTTGGTGCACTTTGTGAGCAAGATACCGAGACATGTGACTATGGCTGGCACAAATTCCAAGGGCAGTGCTACAAATACTTTGCCCATCGACGCACATGGGATGCAGCTGAACGGGAATGCCGTCTGCAGGGTGCCCATCTCACAAGCATCCTGTCTCACGAAGAACAAATGTTTGTTAATCGTGTGGGCCATGATTATCAGTGGATAGGCCTCAATGACAAGATGTTTGAGCATGACTTCCGTTGGACTGATGGCAGCACACTGCAATACGAGAATTGGAGACCCAACCAGCCAGACAGCTTCTTTTCTGCTGGAGAAGACTGTGTTGTAATCATTTGGCATGAGAATGGCCAGTGGAATGATGTTCCCTGCAATTACCATCTCACCTATACGTGCAAGAAAGGAACAGTCGCTTGCGGCCAGCCCCCTGTTGTAGAAAATGCCAAGACCTTTGGAAAGATGAAACCTCGTTATGAAATCAACTCCCTGATTAGATACCACTGCAAAGATGGTTTCATTCAACGTCACCTTCCAACTATCCGGTGCTTAGGAAATGGAAGATGGGCTATACCTAAAATTACCTGCATGAACCCATCTGCATACCAAAGGACTTATTCTATGAAATACTTTAAAAATTCCTCATCAGCAAAGGACAATTCAATAAATACATCCAAACATGATCATCGTTGGAGCCGGAGGTGGCAGGAGTCGAGGCGCTGAGAATTC
